# Supplementary material
Source: PubMed Central journal article supplement (PMC5472816)
Supplement: JB.00824-16_zjb999094447s4.pdf [file JB.00824-16_zjb999094447s4.pdf]

Fig. S1

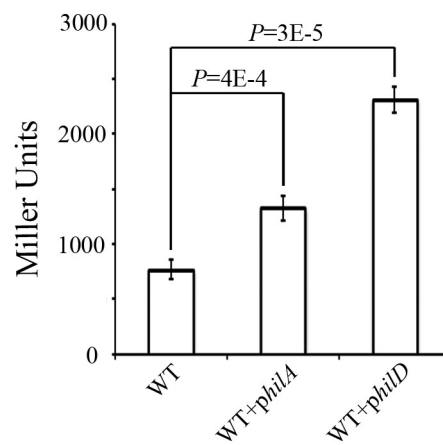

Fig. S1. HilD activates *invF* transcription more profoundly than HilA. The *lacZ* reporter gene was placed under the transcriptional control of *invF* promoters into different *Salmonella* strains.  $\beta$ -galactosidase activity assay was measured following the description in the experimental procedures. Data were obtained from three independent experiments. Results were presented as the mean in Miller units. Error bars indicate standard deviations.
